# Supplementary material
Source: PubMed Central journal article supplement (PMC6198473)
Supplement: develop-145-166488-s1.pdf [file develop-145-166488-s1.pdf]

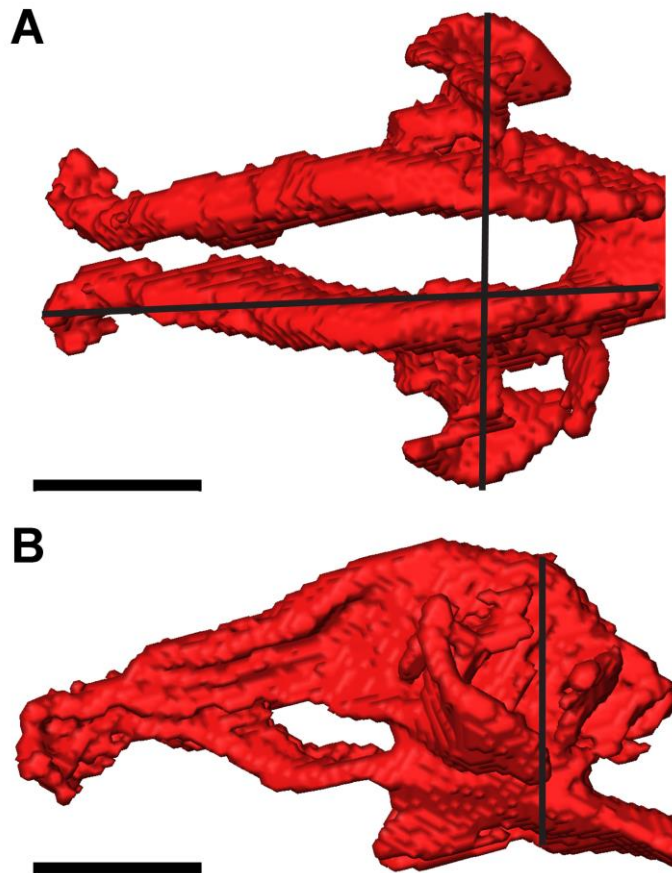

**Fig. S1. Linear measurements within nasal passage endocasts.** (A) Dorsal and (B) lateral view of 3D reconstructions of MRM images of an endocast of the segmented nasal passages from an unaffected, P0 *Fgfr2*<sup>+/+</sup> mouse. Black lines indicate positions for measurements of nasal passage (A) length and width, and (B) height presented in Table S2. Anterior is to the left. Scale bars: 1 mm.

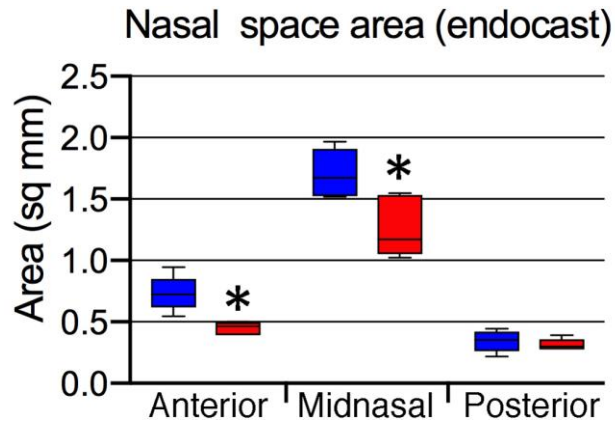

**Fig. S2. Decreases in cross-sectional area of nasal airspace endocasts in the Apert *Fgfr2<sup>+/-S252W</sup>* line.** The cross-sectional area of the nasal passages at anterior, midnasal and posterior locations was determined from MRM endocast slices. Blue boxes, unaffected littermates; red boxes, mutant.  $n=5$ . Data are presented as the median, 25<sup>th</sup> and 75<sup>th</sup> percentiles; whiskers indicate minimum and maximum values. \* $P<0.05$  (Student's *t*-test).

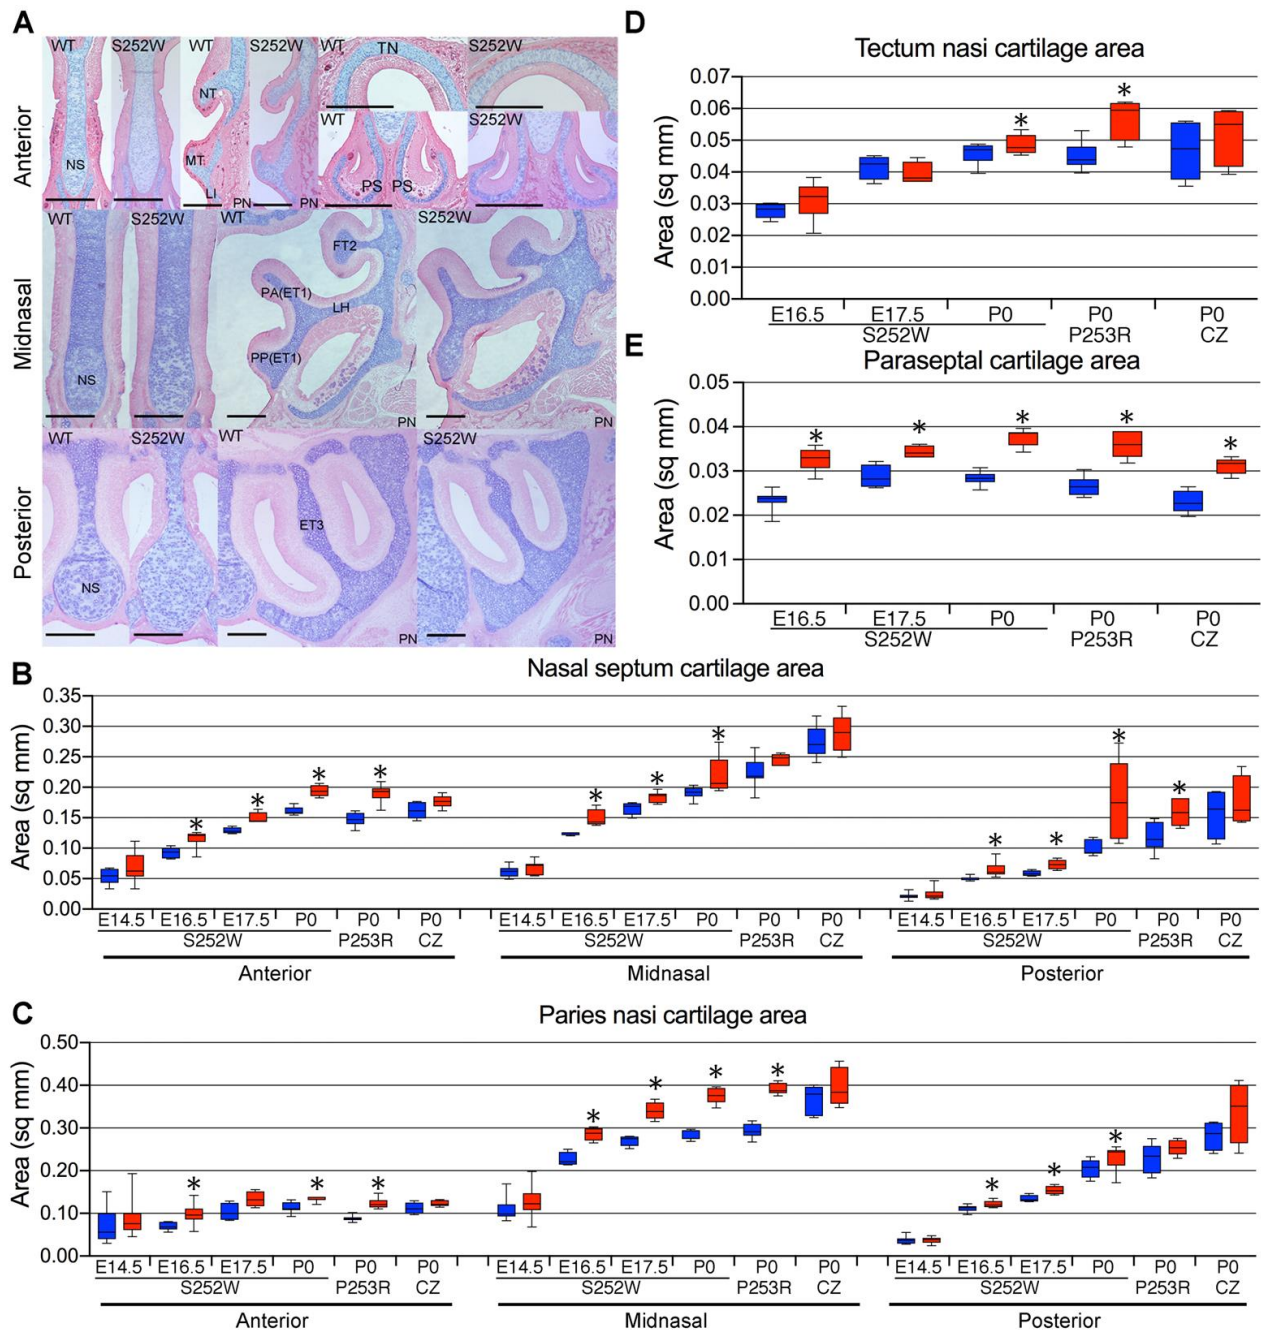

**Fig. S3. Nasal septum, paries nasi, tectum nasi, and paraseptal cartilage cross-sectional areas are greater in *Fgfr2* mutant mice.** (A) Alcian blue/eosin staining of nasal septum (NS), paries nasi (PN), tectum nasi (TN), and paraseptal cartilages (PS) in the anterior, midnasal, and posterior regions of P0 *Fgfr2*<sup>+/+</sup> (WT) and Apert *Fgfr2*<sup>+/S252W</sup> (S252W) mice (TN and PS in anterior only). Scale bars: 250  $\mu$ m. (B) Nasal septum, (C) Paries nasi, (D) Tectum nasi, and (E) Paraseptal cartilage area measurements. Abbreviations: WT, *Fgfr2*<sup>+/+</sup>; S252W, Apert *Fgfr2*<sup>+/S252W</sup>; P253R, Apert *Fgfr2*<sup>+/P253R</sup>; CZ,

Crouzon *Fgfr2c*<sup>C342Y/+</sup>; ET3, ethmoturbinate 3; FT2, frontoturbinate 2; LH, lamina horizontalis; LI, lamina infraconchalis; MT, maxilloturbinate; NT, nasoturbinate; PA(ET1), pars anterior (ethmoturbinate 1); PP(ET1), pars posterior (ethmoturbinate 1). Blue boxes, WT; red boxes, mutant.  $n=4-18$ . Data are presented as the median, 25<sup>th</sup> and 75<sup>th</sup> percentiles; whiskers indicate minimum and maximum values. \* $P<0.05$  (Student's *t*-test).

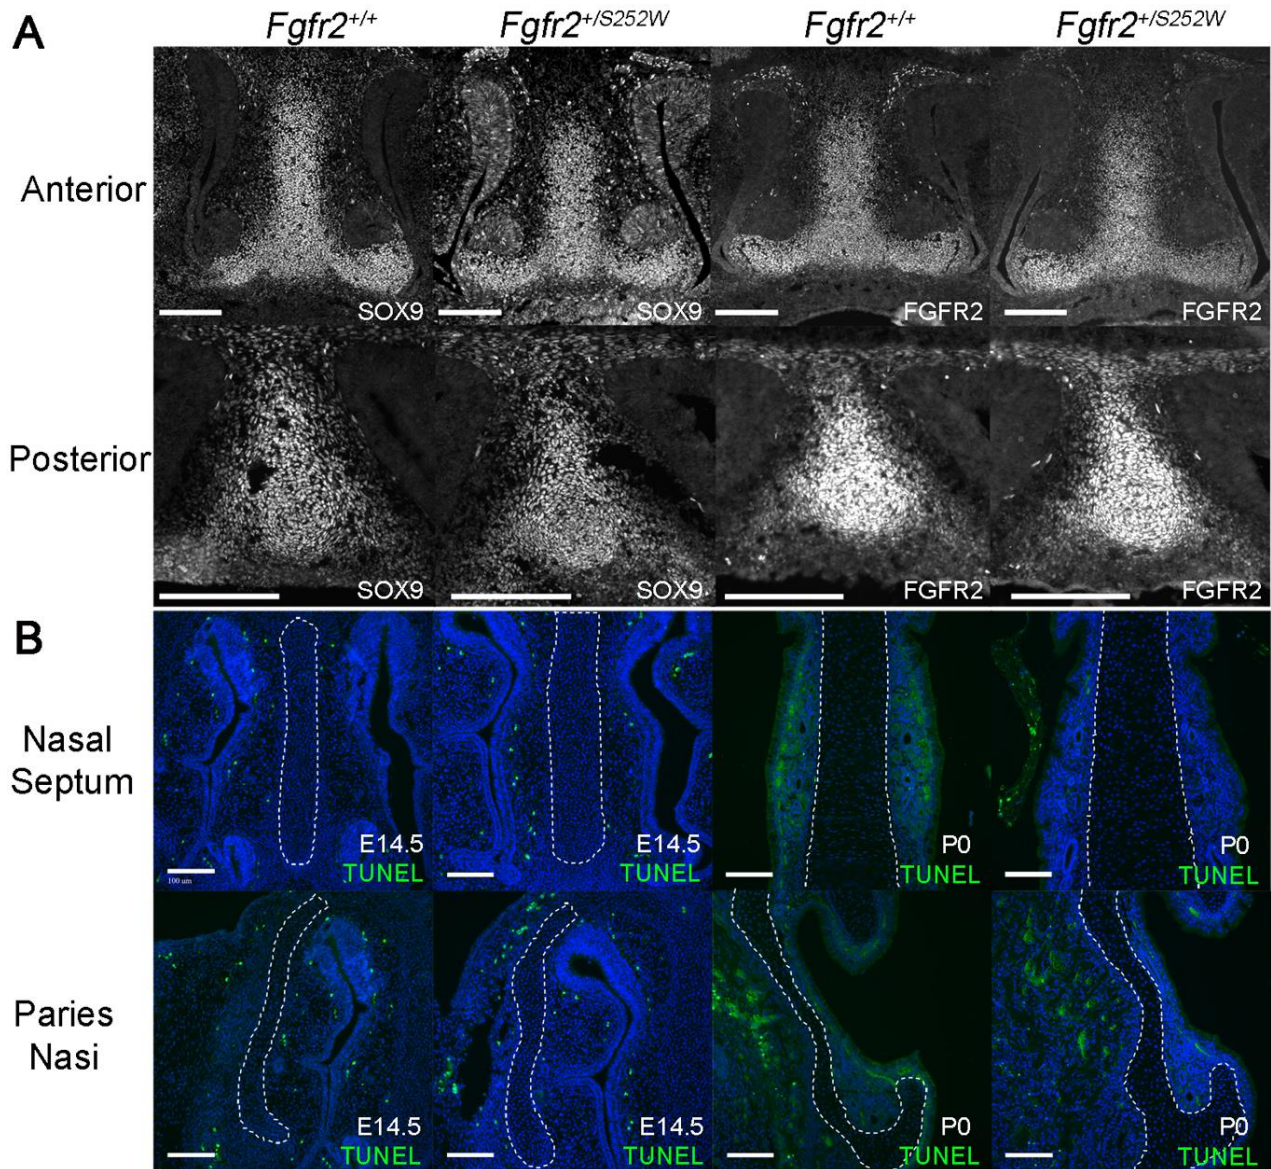

**Fig. S4. Neither early nasal septum anlagen size nor apoptosis are affected in Apert *Fgfr2*<sup>+/S252W</sup> mutants.** (A) *Fgfr2*<sup>+/+</sup> and Apert *Fgfr2*<sup>+/S252W</sup> anterior and posterior nasal septa immunostained for SOX9 or FGFR2 at E12.5. White signal indicates positive staining in grayscale images. Scale bars: 200 μm. (B) *Fgfr2*<sup>+/+</sup> and Apert *Fgfr2*<sup>+/S252W</sup> anterior nasal septa and paries nasi (dashed lines) were assayed for apoptosis using the TUNEL assay (green) at E14.5 and P0. Sections are counterstained with Hoechst 33258. Scale bars: 100 μm.

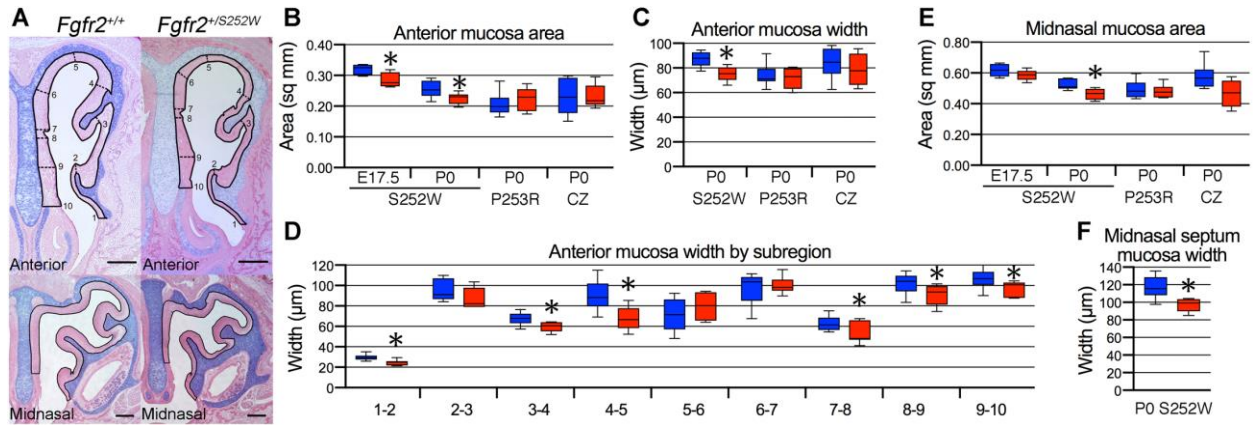

**Fig. S5. Nasal mucosa is narrower in Apert *Fgfr2*<sup>+/S252W</sup> anterior and midnasal regions.** (A) Alcian blue/eosin staining of P0 *Fgfr2*<sup>+/+</sup> and Apert *Fgfr2*<sup>+/S252W</sup> anterior and midnasal regions with the nasal mucosa area outlined in black and locations of anterior width measurements numbered 1-10. Scale bars: 500 μm. (B) Anterior mucosa area. (C) Anterior mucosa width. (D) Anterior mucosa width by subregion. (E) Midnasal mucosa area. (F) Midnasal mucosa width along the nasal septum. Blue boxes, WT; red boxes, mutant. *n*=4-11. Data are presented as the median, 25<sup>th</sup> and 75<sup>th</sup> percentiles; whiskers indicate minimum and maximum values. \**P*<0.05 (Student's *t*-test).

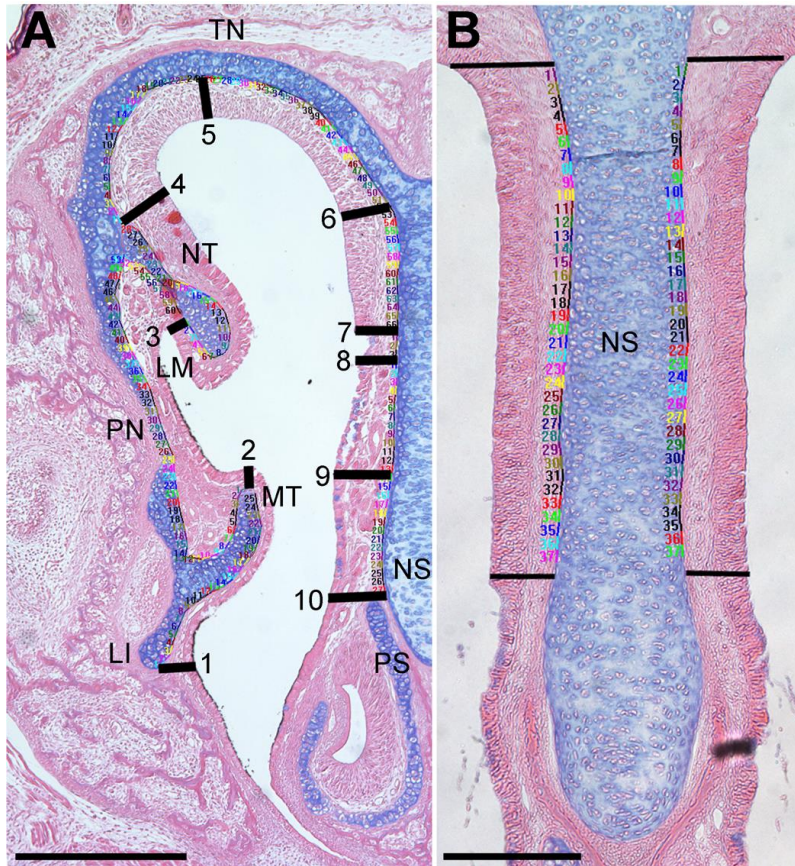

**Fig. S6. Landmarks for width measurement of nasal mucosa.** (A) Anterior landmarks 1-10 used for measuring mucosal width were placed as follows: 1- a horizontal line from the ventral tip of the lamina infraconchalis (LI) to the nasal space. 2- a vertical line from the most dorsal tip of the maxilloturbinate (MT) to the nasal cavity space. 3- a line from the most dorsal portion of the lateral meatus (LM) to the nasoturbinates (NT), perpendicular to the outer edge of the epithelium. 4- a line from the junction of the NT and paries nasi (PN) to the nasal cavity space, perpendicular to the outer edge of the epithelium. 5- a line from the most dorsal point of tectum nasi (TN) to the nasal cavity space, perpendicular to the outer edge of the epithelium. 6- a line from the junction of the TN and nasal septum (NS) to the nasal cavity space, perpendicular to the outer edge of the epithelium. 7- a horizontal line from the NS to the nasal cavity space, dorsal to the indent in the mucosa. 8- a horizontal line from the NS to the nasal cavity space, ventral to the indent in the mucosa. 9- a horizontal line from the NS to the nasal cavity space at the widest part of the mucosa along the NS. 10- a horizontal line from the NS to the nasal cavity space,

dorsal to the paraseptal cartilage (PS). Segmented regions of 20  $\mu\text{m}$  are indicated by colored numbers. Scale bar: 400  $\mu\text{m}$ . (B) Dorsal and ventral boundaries for measuring mucosal width along the midnasal septum (NS) are indicated by horizontal lines. Segmented regions of 20  $\mu\text{m}$  are indicated by colored numbers. Scale bar: 200  $\mu\text{m}$ .



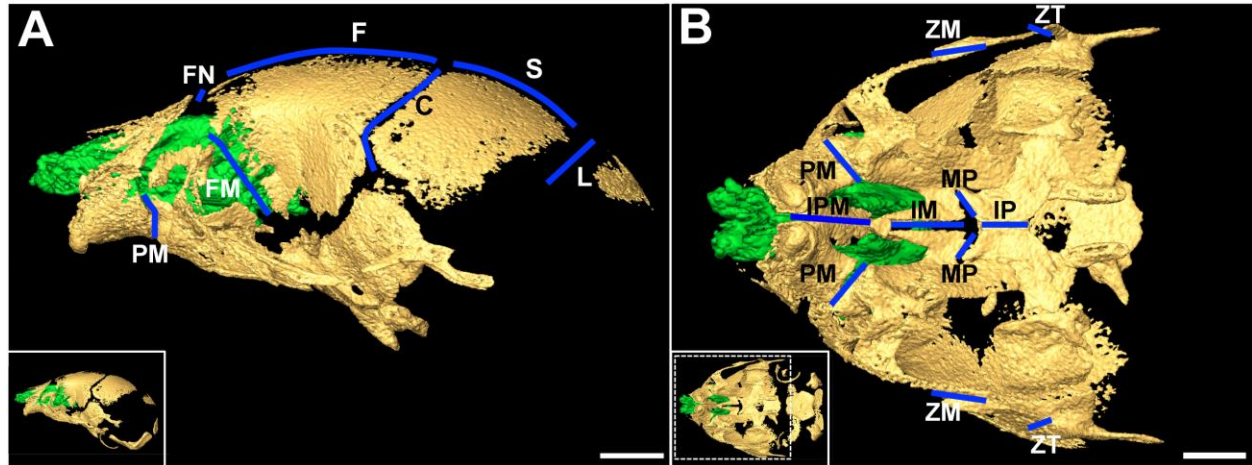

**Fig. S7. Relationship between the nasal capsule and craniofacial sutures in the P0 WT mouse.** A  $\mu$ CT reconstruction of a partial P0 mouse skull (yellow) is shown superimposed on an MRM reconstruction of the nasal capsule (green) in (A) lateral and (B) ventral view. Dashed box in lower left inset of B shows area of enlargement. Sutures are indicated by blue lines. C, coronal; F, frontal; FM, frontomaxillary; FN, frontonasal; IM, intermaxillary; IP, interpalatine; IPM, interpremaxillary; L, lambdoid; MP, maxillary-palatine; PM, premaxillary-maxillary; S, sagittal; ZM, zygomatic-maxillary; ZT, zygomatic-temporal. Scale bars: 1 mm.

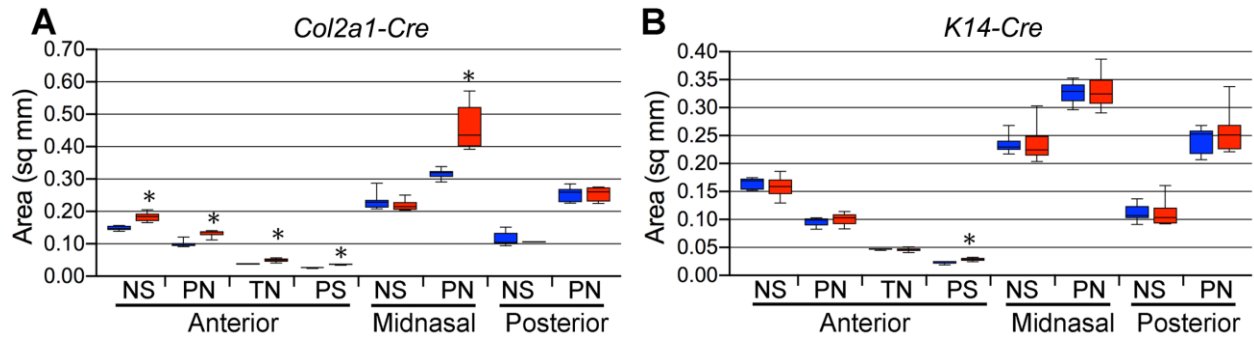

**Fig. S8. Areas of cartilage elements in tissue-specific *Cre+;Fgfr2<sup>+/S252W</sup>* lines at P0 are increased with *Col2a1-Cre*, but not *K14-Cre*.** (A) Cartilage element area measurements in WT and *Col2a1-Cre+;Fgfr2<sup>+/S252W</sup>* mice. (B) Cartilage element area measurements in WT and *K14-Cre+;Fgfr2<sup>+/S252W</sup>* mice. Abbreviations: NS, nasal septum; PN, paries nasi; TN, tectum nasi; PS, paraseptal cartilage. Blue boxes, WT; red boxes, mutant.  $n=4-11$ . Data are presented as the median, 25<sup>th</sup> and 75<sup>th</sup> percentiles; whiskers indicate minimum and maximum values. \* $P<0.05$  (Student's *t*-test).

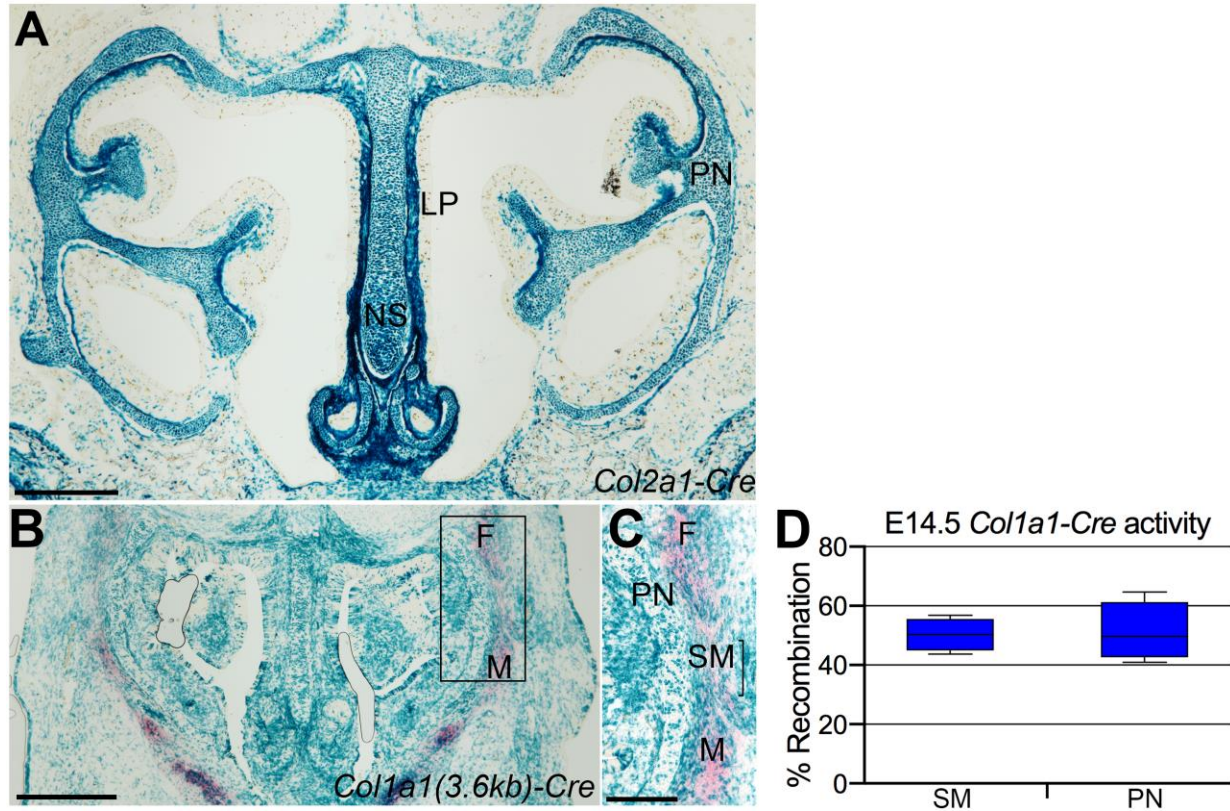

**Fig. S9. Expression of *Col2a1-* and *Col1a1(3.6kb)-Cre*.** (A) Coronal section through the midnasal region of a P0 *Col2a1-Cre+;R26R+* head stained for X-gal (blue). *Cre* activity was present throughout nasal capsule cartilage. Strong expression was also present in the lamina propria (LP) adjacent to the nasal septum (NS), and scattered cells throughout the facial mesenchyme. PN, paries nasi. Scale bar: 500  $\mu$ m. (B) Coronal section through the midnasal region of an E14.5 *Col1a1(3.6kb)-Cre+;R26R+* head stained for X-gal (blue) and ALP (red). Boxed region indicates area shown in C. F, frontal bone anlagen; M, maxillary bone anlagen. Scale bar: 500  $\mu$ m. (C) Enlargement of boxed area in B. Scale bar: 100  $\mu$ m. SM, suture mesenchyme. (D) % recombination in *Col1a1(3.6kb)-Cre+;R26R+* frontomaxillary suture mesenchyme and paries nasi cartilage at E14.5.  $n=4$ . Data are presented as the median, 25<sup>th</sup> and 75<sup>th</sup> percentiles; whiskers indicate minimum and maximum values.

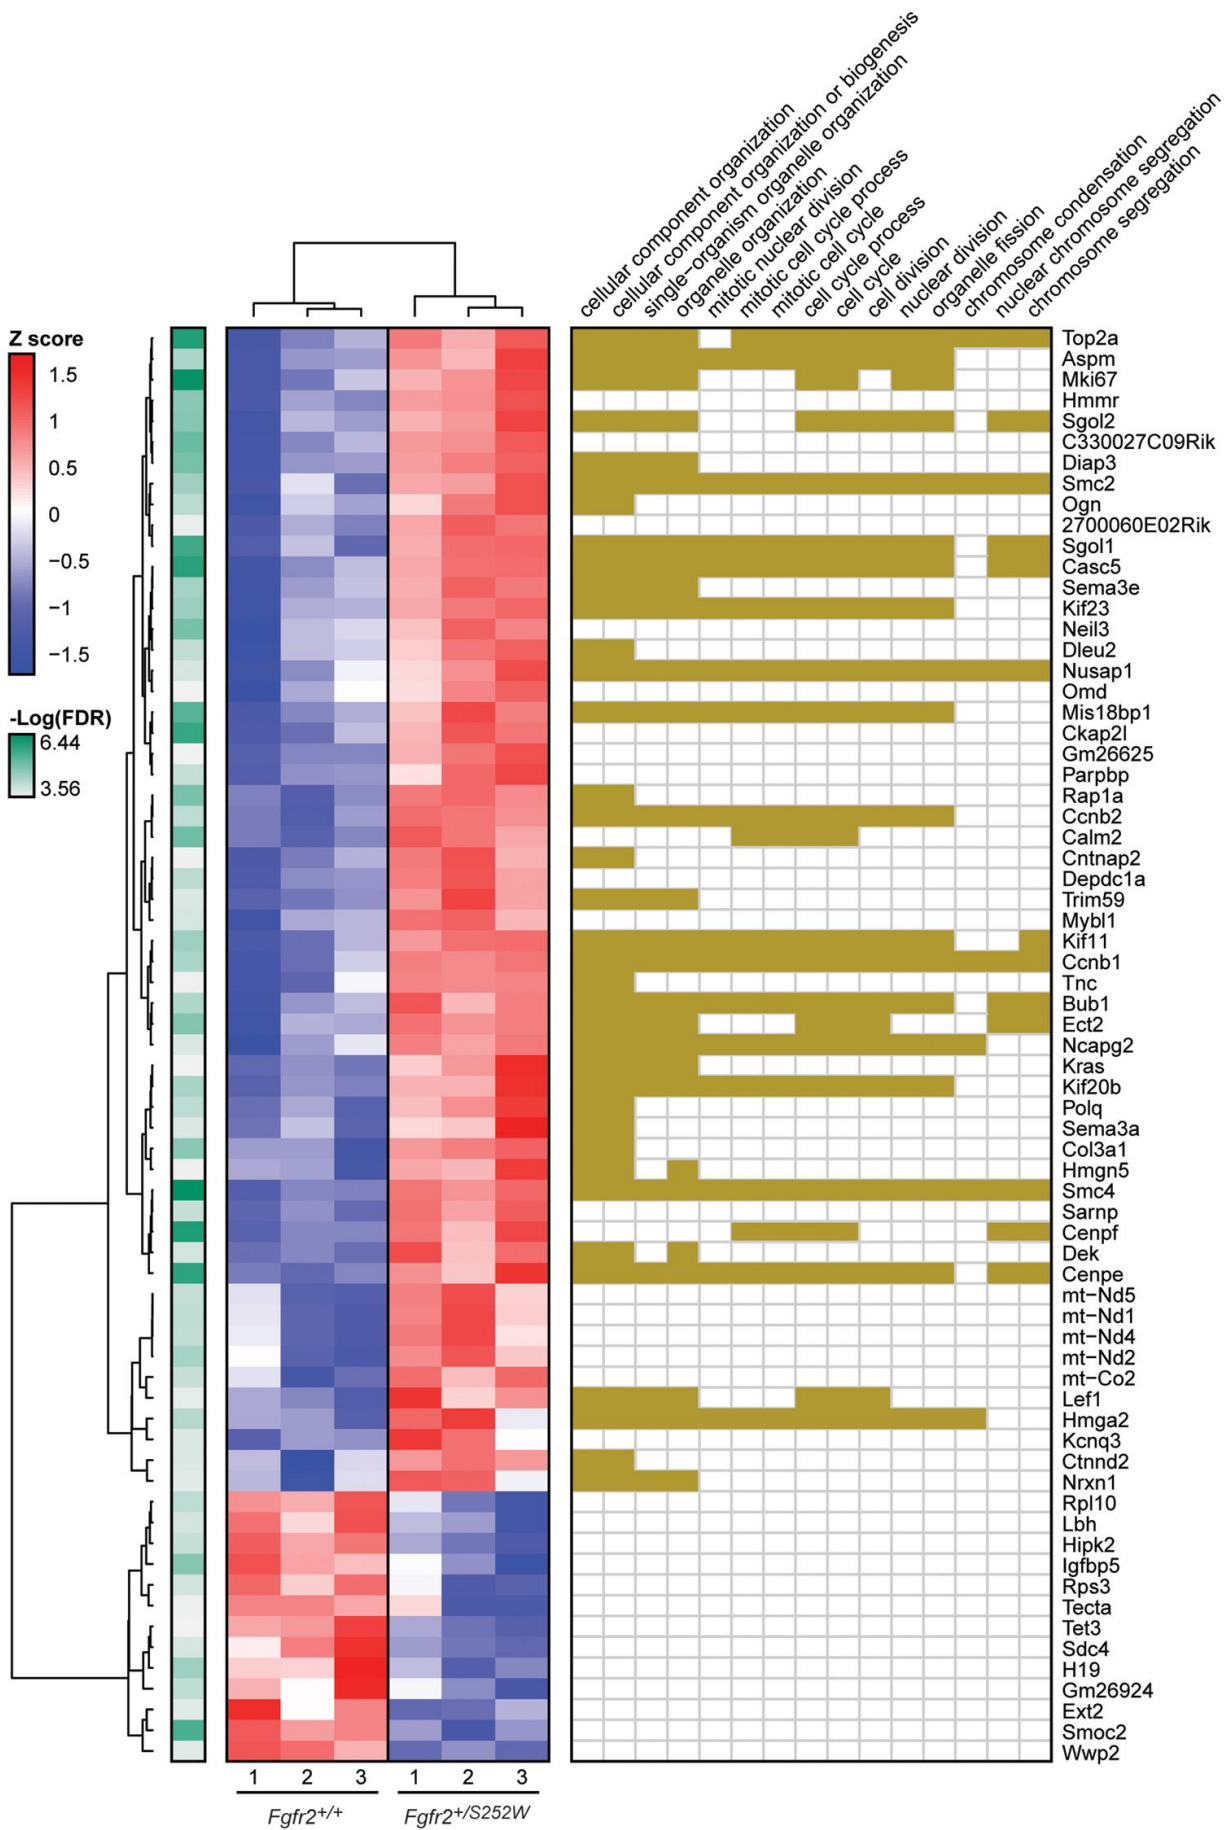

**Fig. S10. Differential gene expression at E14.5 in Apert *Fgfr2*<sup>+/*S252W*</sup> nasal cartilage.**

(Left) Heat map shows hierarchical clustering of genes differentially expressed genes in Apert *Fgfr2*<sup>+/*S252W*</sup> nasal cartilage compared to WT (FDR <0.05). Rows show the change in expression converted to a Z-score (red/blue, color key on left) and columns represent different, replicate experimental samples (labeled at bottom). FDR adjusted *P*-values are shown in green (color key on left). (Right) Gene Ontology Biological Process (GO BP) terms associated with each gene are shown (brown) for significantly (*P*<0.05) enriched GO BP terms.

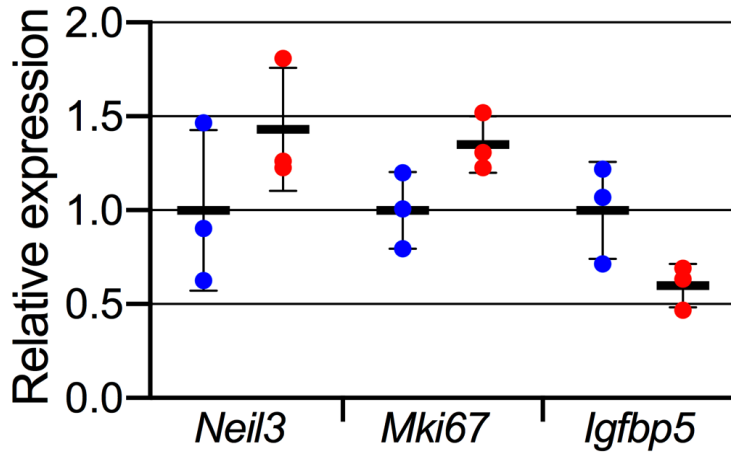

**Fig. S11. RT-qPCR validation of differential gene expression at E14.5 in Apert *Fgfr2*<sup>+/*S252W*</sup> nasal cartilage.** Relative expression of the indicated genes in the E14.5 anterior nasal septum was compared between WT (blue; *n*=3) and Apert *Fgfr2*<sup>+/*S252W*</sup> mutants (red; *n*=3) embryos. Black bars indicate mean and standard deviation. *P*-values (Student's *t*-test) are 0.24 (*Neil3*), 0.07 (*Mki67*), and 0.07 (*Igfbp5*).

**Table S1. Summary of features of craniosynostosis mouse models used in study.**

| Feature                                           | Apert<br><i>Fgfr2</i> <sup>+/S252W</sup>   | Apert<br><i>Fgfr2</i> <sup>+/P253R</sup>   | Crouzon/Pfeiffer<br><i>Fgfr2c</i> <sup>C342Y/+</sup> |
|---------------------------------------------------|--------------------------------------------|--------------------------------------------|------------------------------------------------------|
| <b>Cre-dependent expression</b>                   | yes                                        | yes                                        | no                                                   |
| <b>Isoforms affected</b>                          | epithelial,<br>mesenchymal                 | epithelial,<br>mesenchymal                 | mesenchymal                                          |
| <b>Background</b>                                 | C57BL/6J                                   | C57BL/6J                                   | CD1                                                  |
| <b>Perinatal lethality</b>                        | yes                                        | yes                                        | no                                                   |
| <b>Facial sutures fusing at E17.5<sup>A</sup></b> | frontomaxillary;<br>premaxillary-maxillary | frontomaxillary;<br>premaxillary-maxillary | not determined                                       |
| <b>Facial sutures fusing at P0<sup>B</sup></b>    | all except the<br>intermaxillary           | all except<br>intermaxillary               | interpremaxillary;<br>maxillary-palatine             |
| <b>Calvarial sutures fusing at E17.5</b>          | coronal                                    | coronal                                    | coronal                                              |
| <b>Calvarial sutures fusing at P0</b>             | coronal                                    | coronal                                    | coronal                                              |

<sup>A</sup> Suture information is summarized from Martinez-Abadias et al., 2010, 2013b and Motch Perrine et al., 2014. For each genotype, suture patency is variable across mice examined within developmental ages. Sutures listed here as “fusing” were fusing or completely fused in at least 20% of mice examined in a genotype group. See publications for more detailed analysis of variation in timing and extent of fusion for individual sutures and genotypes.

<sup>B</sup> “all” includes the following sutures: premaxillary-maxillary, zygomatic-maxillary, maxillary-palatine, frontomaxillary. Facial sutures that were scored but that did not show fusion in at least 10% of the Apert syndrome mouse models examined include: intermaxillary, interpremaxillary, interpalatine, frontopremaxillary, and frontonasal. The interpremaxillary suture fuses in WT and Crouzon *Fgfr2c*<sup>C342Y/+</sup> mice. Difference in suture closure patterns in the two Apert syndrome models is one of degree rather than kind with similar numbers of mice showing fusion in most sutures, excepting the maxillary-palatine suture and the frontomaxillary suture where a greater number of mice show fusion in the Apert *Fgfr2*<sup>+/S252W</sup> model. The facial sutures of Crouzon *Fgfr2c*<sup>C342Y/+</sup> mice tend to fuse later than the facial sutures in either Apert syndrome model, and the Crouzon *Fgfr2c*<sup>C342Y/+</sup> facial phenotype is not as apparent at birth relative to the two Apert models.

**Table S2. Statistical comparison of linear dimensions of the nasal passages in the Apert *Fgfr2*<sup>+/*S252W*</sup> model.**

| Age   | Dimension | <i>n</i><br>WT* | <i>n</i><br>MT‡ | WT distance<br>(mean±s.e.m.)§ | MT distance<br>(mean±s.e.m.)§ | WT<br>vs MT<br>( <i>P</i> -value) | WT P0<br>vs E17.5<br>( <i>P</i> -value) | MT P0<br>vs E17.5<br>( <i>P</i> -value) |
|-------|-----------|-----------------|-----------------|-------------------------------|-------------------------------|-----------------------------------|-----------------------------------------|-----------------------------------------|
| E17.5 | Length    | 6               | 5               | 3.97 ± 0.07                   | 3.86 ± 0.11                   | 0.329                             | -                                       | -                                       |
|       | Width     | 6               | 5               | 2.51 ± 0.02                   | 2.33 ± 0.10                   | 0.177                             | -                                       | -                                       |
|       | Height    | 6               | 5               | 1.61 ± 0.05                   | 1.57 ± 0.01                   | 0.429                             | -                                       | -                                       |
| P0    | Length    | 5               | 5               | 4.21 ± 0.16                   | 4.16 ± 0.12                   | 0.841                             | 0.429                                   | 0.095                                   |
|       | Width     | 5               | 5               | 2.97 ± 0.10                   | 2.50 ± 0.04                   | 0.008                             | 0.004                                   | 0.222                                   |
|       | Height    | 5               | 5               | 1.91 ± 0.08                   | 1.51 ± 0.11                   | 0.032                             | 0.030                                   | 0.151                                   |

\*WT, unaffected. ‡MT, mutant. §Distances in mm; s.e.m., standard error of the mean.



**Table S3. Statistical comparison of the nasal passage airspace volume of the *Col2a1-Cre+;Fgfr2<sup>+S252W</sup>* line.**

| Age       | <i>n</i><br>WT; <i>Col2a1-Cre+;Fgfr2<sup>+/+</sup></i> | <i>n</i><br>MT; <i>Col2a1-Cre+;Fgfr2<sup>+S252W</sup></i> | WT volume<br>(mean±s.e.m.)* | MT volume<br>(mean±s.e.m.)* | WT<br>vs MT<br>( <i>P</i> -value) |
|-----------|--------------------------------------------------------|-----------------------------------------------------------|-----------------------------|-----------------------------|-----------------------------------|
| <b>P0</b> | 5                                                      | 5                                                         | 2.72 ± 0.10                 | 2.60 ± 0.09                 | 0.42                              |

\*Volumes are in mm<sup>3</sup>; s.e.m., standard error of the mean.

**Table S4. Differential gene expression in Apert *Fgfr2*<sup>+/S252W</sup> E14.5 nasal septum cartilage, relative to unaffected littermates (FDR<0.05).**

| Gene Symbol <sup>A</sup>    | Ensembl ID         | Average WT Log2 FPKM | Log2 fold change | False Discovery Rate |
|-----------------------------|--------------------|----------------------|------------------|----------------------|
| <i>Omd</i>                  | ENSMUSG00000048368 | 3.89                 | 2.11             | 0.047                |
| <u><i>Sema3e</i></u>        | ENSMUSG00000063531 | 4.39                 | 1.61             | 0.016                |
| <u><i>Neil3</i></u>         | ENSMUSG00000039396 | 6.67                 | 1.48             | 0.009                |
| <b><i>Ect2</i></b>          | ENSMUSG00000027699 | 4.94                 | 1.47             | 0.010                |
| <b><i>Lef1</i></b>          | ENSMUSG00000027985 | 4.19                 | 1.43             | 0.042                |
| <i>Nrxn1</i>                | ENSMUSG00000024109 | 5.52                 | 1.37             | 0.039                |
| <b><i>Diap3</i></b>         | ENSMUSG00000022021 | 5.21                 | 1.35             | 0.009                |
| <b><i>Sgol1</i></b>         | ENSMUSG00000023940 | 5.99                 | 1.32             | 0.003                |
| <u><i>Depdc1a</i></u>       | ENSMUSG00000028175 | 4.60                 | 1.30             | 0.022                |
| <u><i>Ckap2l</i></u>        | ENSMUSG00000048327 | 6.49                 | 1.28             | 0.003                |
| <b><i>Casc5</i></b>         | ENSMUSG00000027326 | 7.13                 | 1.22             | 0.003                |
| <u><i>Polg</i></u>          | ENSMUSG00000034206 | 5.05                 | 1.22             | 0.022                |
| <b><i>Sgol2</i></b>         | ENSMUSG00000026039 | 6.01                 | 1.21             | 0.010                |
| <u><i>C330027C09Rik</i></u> | ENSMUSG00000033031 | 6.06                 | 1.19             | 0.007                |
| <i>Kcnq3</i>                | ENSMUSG00000056258 | 5.13                 | 1.18             | 0.034                |
| <b><i>Mis18bp1</i></b>      | ENSMUSG00000047534 | 6.85                 | 1.14             | 0.005                |
| <i>Sema3a</i>               | ENSMUSG00000028883 | 5.92                 | 1.13             | 0.033                |
| <u><i>Dleu2</i></u>         | ENSMUSG00000097589 | 6.18                 | 1.11             | 0.023                |
| <u><i>Trim59</i></u>        | ENSMUSG00000034317 | 4.89                 | 1.11             | 0.033                |
| <i>mt-Co2</i>               | ENSMUSG00000064354 | 5.55                 | 1.10             | 0.024                |
| <u><i>Parpbp</i></u>        | ENSMUSG00000035365 | 5.59                 | 1.09             | 0.023                |
| <i>Cntnap2</i>              | ENSMUSG00000039419 | 4.83                 | 1.09             | 0.047                |
| <b><i>Cenpe</i></b>         | ENSMUSG00000045328 | 7.82                 | 1.07             | 0.003                |
| <u><i>Hmgn5</i></u>         | ENSMUSG00000031245 | 5.17                 | 1.06             | 0.047                |
| <b><i>Cenpf</i></b>         | ENSMUSG00000026605 | 7.65                 | 1.05             | 0.003                |
| <b><i>Mki67</i></b>         | ENSMUSG00000031004 | 10.36                | 1.05             | 0.002                |
| <b><i>Kif23</i></b>         | ENSMUSG00000032254 | 6.27                 | 1.05             | 0.015                |
| <b><i>Bub1</i></b>          | ENSMUSG00000027379 | 5.98                 | 1.05             | 0.018                |
| <b><i>Ccnb1</i></b>         | ENSMUSG00000041431 | 5.84                 | 1.04             | 0.017                |
| <u><i>Sarnp</i></u>         | ENSMUSG00000078427 | 5.28                 | 1.03             | 0.023                |
| <u><i>Hmmr</i></u>          | ENSMUSG00000020330 | 6.25                 | 1.02             | 0.010                |
| <b><i>Nusap1</i></b>        | ENSMUSG00000027306 | 6.66                 | 1.01             | 0.031                |
| <b><i>Ccnb2</i></b>         | ENSMUSG00000032218 | 5.60                 | 0.99             | 0.022                |
| <b><i>Top2a</i></b>         | ENSMUSG00000020914 | 8.64                 | 0.98             | 0.003                |
| <u><i>Ctnnd2</i></u>        | ENSMUSG00000022240 | 6.23                 | 0.98             | 0.034                |
| <b><i>Ncapg2</i></b>        | ENSMUSG00000042029 | 6.12                 | 0.98             | 0.033                |
| <b><i>Smc4</i></b>          | ENSMUSG00000034349 | 8.26                 | 0.96             | 0.002                |
| <b><i>Kif20b</i></b>        | ENSMUSG00000024795 | 6.51                 | 0.95             | 0.017                |
| <i>Ogn</i>                  | ENSMUSG00000021390 | 7.34                 | 0.92             | 0.022                |

|               |                    |       |       |       |
|---------------|--------------------|-------|-------|-------|
| <b>Smc2</b>   | ENSMUSG00000028312 | 7.53  | 0.88  | 0.015 |
| <u>Mybl1</u>  | ENSMUSG00000025912 | 6.42  | 0.86  | 0.031 |
| <b>Aspm</b>   | ENSMUSG00000033952 | 7.24  | 0.83  | 0.017 |
| <b>Kif11</b>  | ENSMUSG00000012443 | 7.25  | 0.81  | 0.015 |
| <u>Rap1a</u>  | ENSMUSG00000068798 | 7.81  | 0.78  | 0.009 |
| <b>Hmga2</b>  | ENSMUSG00000056758 | 9.80  | 0.76  | 0.019 |
| Gm26625       | ENSMUSG00000097138 | 6.48  | 0.73  | 0.049 |
| mt-Nd2        | ENSMUSG00000064345 | 11.58 | 0.72  | 0.016 |
| <b>Calm2</b>  | ENSMUSG00000036438 | 8.92  | 0.72  | 0.008 |
| Col3a1        | ENSMUSG00000026043 | 8.96  | 0.71  | 0.010 |
| 2700060E02Rik | ENSMUSG00000021807 | 7.26  | 0.67  | 0.043 |
| Tnc           | ENSMUSG00000028364 | 8.00  | 0.65  | 0.047 |
| <u>Kras</u>   | ENSMUSG00000030265 | 7.82  | 0.63  | 0.047 |
| mt-Nd4        | ENSMUSG00000064363 | 12.54 | 0.59  | 0.023 |
| <u>Dek</u>    | ENSMUSG00000021377 | 9.08  | 0.57  | 0.031 |
| mt-Nd1        | ENSMUSG00000064341 | 12.92 | 0.55  | 0.023 |
| mt-Nd5        | ENSMUSG00000064367 | 13.23 | 0.52  | 0.023 |
| <u>Wwp2</u>   | ENSMUSG00000031930 | 10.04 | -0.50 | 0.038 |
| <u>Tet3</u>   | ENSMUSG00000034832 | 7.30  | -0.67 | 0.047 |
| <u>Hipk2</u>  | ENSMUSG00000061436 | 7.86  | -0.68 | 0.023 |
| <u>Rpl10</u>  | ENSMUSG00000008682 | 8.13  | -0.77 | 0.022 |
| <u>H19</u>    | ENSMUSG00000000031 | 11.74 | -0.77 | 0.015 |
| <u>Ext2</u>   | ENSMUSG00000027198 | 7.35  | -0.80 | 0.038 |
| <u>Rps3</u>   | ENSMUSG00000030744 | 7.54  | -0.82 | 0.031 |
| <u>Sdc4</u>   | ENSMUSG00000017009 | 6.49  | -0.95 | 0.031 |
| <u>Igfbp5</u> | ENSMUSG00000026185 | 11.37 | -1.02 | 0.010 |
| <u>Lbh</u>    | ENSMUSG00000024063 | 5.89  | -1.04 | 0.031 |
| <u>Smoc2</u>  | ENSMUSG00000023886 | 6.64  | -1.14 | 0.004 |
| Gm26924       | ENSMUSG00000098178 | 14.61 | -1.18 | 0.023 |
| Tecta         | ENSMUSG00000037705 | 0.89  | -3.58 | 0.047 |

<sup>A</sup> Genes in **bold** (24/69) were identified as enriched in Biological Process categories related to regulation of the chromosome or cell cycle. Genes underlined (26/69) were linked to regulation of the cell cycle by literature search.

**Table S5. Differential expression of select *Fgf*, *Fgfr*, and *Sox* genes in Apert *Fgfr2*<sup>+/*S252W*</sup> E14.5 nasal septum cartilage, relative to unaffected littermates.**

| Gene Symbol  | Ensembl ID         | Average WT Log2 FPKM | Log2 fold change | False Discovery Rate |
|--------------|--------------------|----------------------|------------------|----------------------|
| <i>Fgf2</i>  | ENSMUSG00000037225 | 4.97                 | -0.09            | 0.913                |
| <i>Fgf11</i> | ENSMUSG00000042826 | 2.41                 | 0.06             | 0.967                |
| <i>Fgf12</i> | ENSMUSG00000022523 | 0.92                 | -2.27            | 0.278                |
| <i>Fgf13</i> | ENSMUSG00000031137 | 0.662                | -0.03            | 0.992                |
| <i>Fgfr1</i> | ENSMUSG00000031565 | 6.03                 | -0.18            | 0.643                |
| <i>Fgfr2</i> | ENSMUSG00000030849 | 7.68                 | -0.27            | 0.395                |
| <i>Fgfr3</i> | ENSMUSG00000054252 | 5.15                 | -0.01            | 0.989                |
| <i>Fgfr4</i> | ENSMUSG00000005320 | 2.40                 | -0.72            | 0.470                |
| <i>Sox5</i>  | ENSMUSG00000041540 | 8.09                 | -0.11            | 0.752                |
| <i>Sox6</i>  | ENSMUSG00000051910 | 7.22                 | -0.10            | 0.786                |
| <i>Sox9</i>  | ENSMUSG00000000567 | 8.06                 | -0.69            | 0.057                |

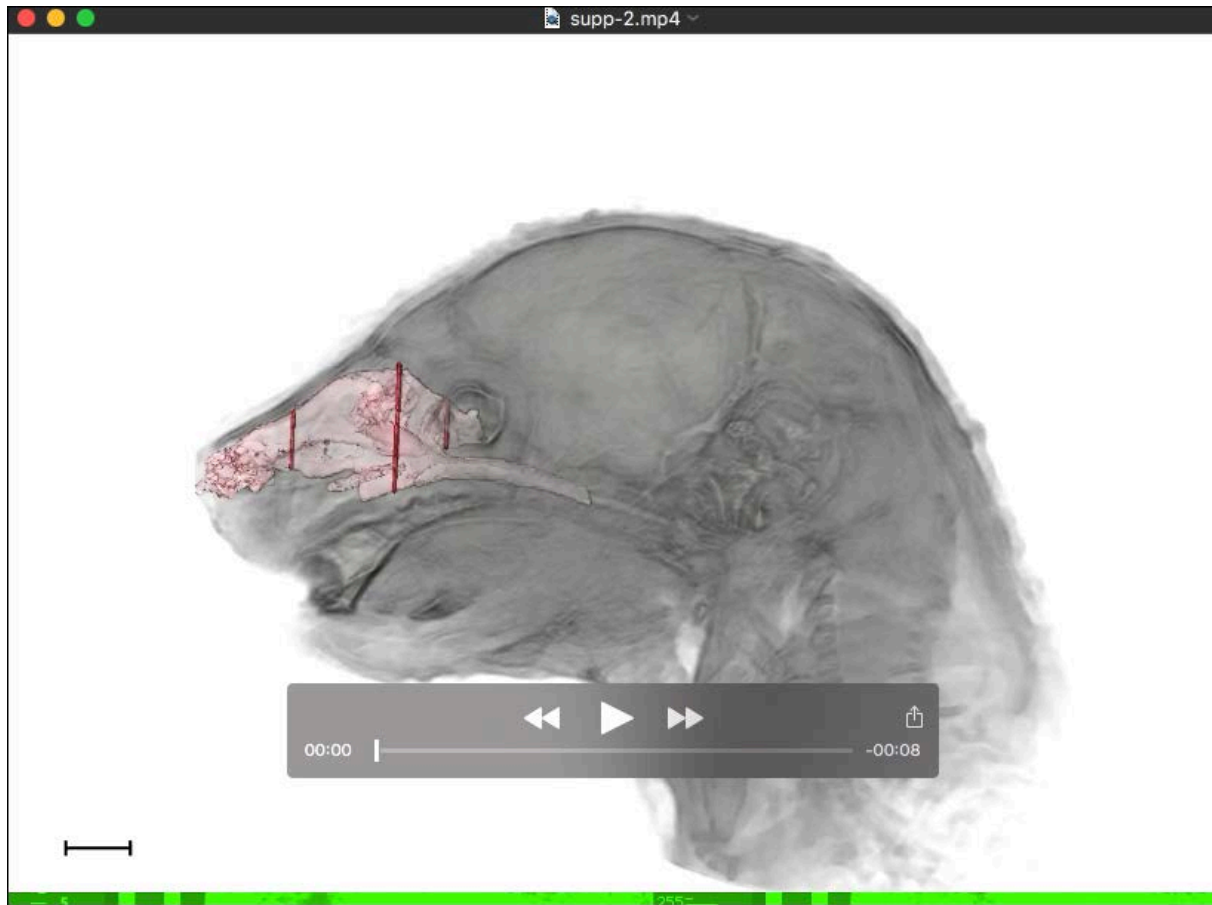

**Movie 1. 3D MRM rendering of an unaffected, P0 *Fgfr2*<sup>+/+</sup> mouse head.** The nasal passages and nasopharyngeal duct are shown in pink. The anterior, midnasal and posterior nasal slices corresponding to the locations described in Fig. 1 are indicated in red.

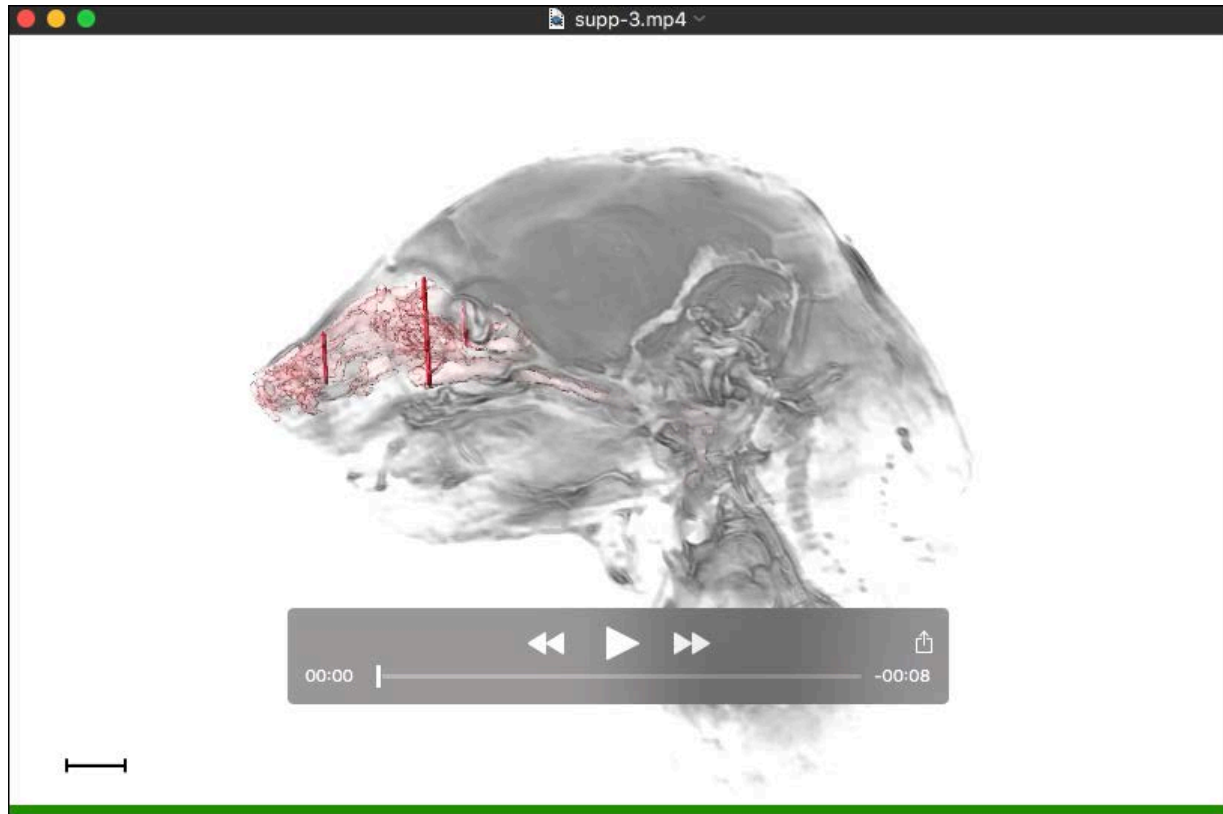

**Movie 2. 3D MRM rendering of a P0 Apert *Fgfr2*<sup>+/S252W</sup> mouse head.** The nasal passages and nasopharyngeal duct are shown in pink. The anterior, midnasal and posterior nasal slices corresponding to the locations described in Fig. 1 are indicated in red.
